1 **Timing is (almost) everything in a comprehensive, spike-resolved flight**  
2 **motor program**

3 Rachel Conn<sup>1,2†</sup>, Joy Putney<sup>3†</sup>, Simon Sponberg<sup>1,3\*</sup>

4 <sup>1</sup>School of Physics, Georgia Institute of Technology, Atlanta, GA, 30332 USA

5 <sup>2</sup>Neuroscience Program, Emory University, Atlanta, GA, USA

6 <sup>3</sup>School of Biological Sciences & Graduate Program in Quantitative Biosciences,  
7 Georgia Institute of Technology, Atlanta, GA, 30332 USA

8 †**These authors contributed equally to this work.**

9 **\*Correspondence:**

10 Dr. Simon Sponberg

11 Georgia Institute of Technology

12 School of Physics & School of Biological Sciences

13 Atlanta, GA 30332, USA

14 sponberg@gatech.edu

15

## Abstract

16 Precise spike timing can be critical in sensory systems. In a few specific motor systems, we now know  
17 millisecond-scale timing of neural spikes is functionally important for behavior. However, we know  
18 little about the extent of timing codes across the whole motor program of an animal. Taking advantage  
19 of the relatively few motor units that control the wings of a hawk moth, we captured a comprehensive,  
20 spike-resolved motor program in tethered flight. We simultaneously record nearly every action potential  
21 from all muscles and the resulting forces. We find that timing encodes more information than rate in  
22 every motor unit. Motor units use consistent encoding, blending precise spike timing and rate  
23 information in a 3:1 ratio, despite their varying functions. Finally, we show that each muscle is  
24 coordinated with all other muscles through spike timings while spike rates are independent. Spike  
25 timing codes are ubiquitous, consistent, and essential for coordination.

## Introduction

26  
27 Neurons convey information through both rate and temporal codes [1–3]. Both the firing rate and the  
28 precise, millisecond-level sequences of spikes are well established as essential encoding mechanisms for  
29 sensory systems in the periphery and cortex for proprioception [4], audition [5], vision [6], touch [7], and  
30 other modalities [8, 9]. Rate codes are thought to be the predominant strategy used by motor systems in  
31 part due to the presumed slow, low-pass nature of muscle force production and recruitment principles  
32 [10–12]. However, recent evidence show that precise spike timings may be under-appreciated for  
33 controlling motor behaviors at least in specific muscles or motor circuits [3]. Temporal codes have been  
34 found in a songbird cortical area for vocalization [13] and in mouse cerebellum for task error correction  
35 [14]. Correlational, causal, and mechanistic studies in biomechanics and muscle physiology show that  
36 millisecond-level changes in timing of spikes in motor neurons can manifest profound changes in force  
37 production and even behavior selection [15, 16]. Temporal encoding is not only present in fast behaviors  
38 like invertebrate flight, but also in relatively slow behaviors like breathing in birds [17]. However,  
39 evidence for the importance of timing codes has been limited to only a few of the motor signals that  
40 typically control movement. Whether temporal codes are utilized broadly across a complete motor  
41 program for behavior is unknown as is their role in coordinating multiple motor units. Despite growing  
42 appreciation of the potential for motor timing codes, we have not yet established the ubiquity,  
43 consistency and coordination of timing strategies compared to rate codes across the motor signals that  
44 compose a behavior.

45 Timing codes may be restricted to only a few motor signals that control behavior. For example,  
46 recordings of small sets of muscles in locusts, hawk moths, and fruit flies have shown that spike timing  
47 and rate variation are prevalent in specific motor units, and that not all muscles have significant timing  
48 variation [18–20]. Alternatively, timing codes may be ubiquitous–widespread across the entire motor  
49 program and present in all muscles controlling a behavior. Regardless of the prevalence of timing codes,  
50 individual motor neurons within the population may exhibit specialized encoding strategies, varying  
51 the amount of timing and rate information depending on the function of the muscles they innervate. For  
52 example, *Drosophila* appear to use combinations of functionally distinct phasic and tonic motor units to  
53 control flight [21]. Additionally, evidence in sensory systems show separate classes of neurons use either  
54 rate or temporal encoding to convey sensory information [22]. Alternatively, timing and rate encoding  
55 strategies may be consistently employed across the entire motor program. Finally, coordination of  
56 multiple motor signals is typically assessed through covariation in muscle rates. For example, motor  
57 coordination patterns across muscles (*e.g.* muscle synergies [23]) and population recordings of M1  
58 neurons in motor cortex (*e.g.* [24]) all consider movement encoding in populations of rate codes.  
59 Alternatively, coordination of muscles may be achieved by sharing information in the motor system  
60 through timing codes. Resolving these hypotheses is challenging because they consider the patterns of  
61 encoding across the entire motor program. It is therefore necessary to record from a spike-resolved,  
62 comprehensive set of motor signals that control a behavior simultaneously in a consistent behavioral  
63 context.

64 Recording a comprehensive motor program is technically challenging due to the requirements of  
65 completeness, sufficient temporal resolution, and sampling rich variation. Obtaining a nearly complete  
66 motor program is more tractable in the peripheral nervous system than in cortex because of smaller  
67 neuronal population sizes. While many muscles or motor units have been simultaneously recorded  
68 using electromyography (EMG) in frogs [25], cats [23], and humans [26] and using calcium imaging in  
69 the wing steering muscles of fruit flies [21], these sets of neural signals are not spike-resolved, so they  
70 lack sufficient temporal resolution to fully investigate the relative importance of rate and temporal  
71 codes. Large flying insects are especially feasible organisms in which to record a spike-resolved,  
72 comprehensive motor program because all muscles actuating the wings are in the thorax, there are  
73 relatively few muscles compared to many segmented limbs, and flight muscles frequently function as  
74 single motor units: they are generally innervated by one or very few fast-type motor neurons with a 1:1  
75 relationship between muscle and neural potentials [27, 28].

76 We take advantage of this opportunity by capturing a spike-resolved, comprehensive motor program in  
77 a hawk moth, *Manduca sexta*, and leveraging it to investigate the importance of temporal encoding in a  
78 nearly complete population code for movement. Many muscles in the hawk moth motor program are  
79 known to exhibit variation in both timing and rate of muscle activation during turning maneuvers in  
80 flight [20, 29–31]. This rich, nearly complete motor program enables us to address three questions about  
81 timing codes in motor systems: First, do all muscles encode flight behavior using precise spike timings?  
82 Second, do muscles use different or consistent strategies to encode flight behavior? Finally, how do rate  
83 and timing codes allow for coordination across muscles?

84

## Results

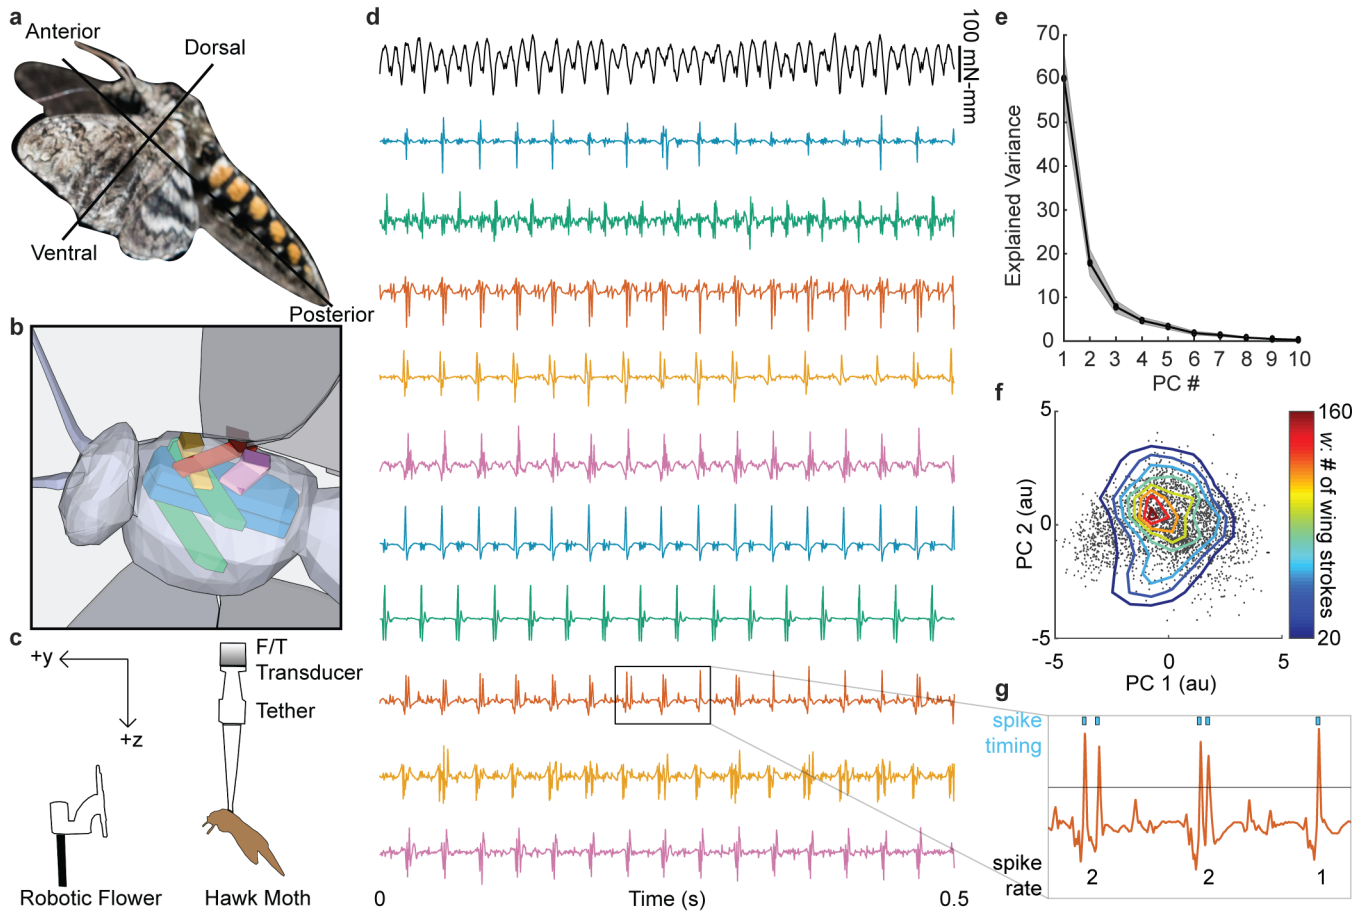

85 **Figure 1 | EMGs from 10 flight muscles and simultaneous yaw torque.. a**, A hawk moth, *Manduca*  
 86 *sexta*, in flight. **b**, A simplified 3D sketch of the 5 bilateral pairs of muscles from a ventrolateral view:  
 87 dorsolongitudinal, DLM (blue); dorsoventral, DVM (green); 3rd axillary, 3AX (orange); basalar, BA  
 88 (yellow); subalar, SA (purple). Muscles on the left and right sides of the animal are distinguished with  
 89 an L or an R (ex. L3AX). **c**, Hawk moths experienced visual stimuli from a robotic flower oscillating with  
 90 a 1 Hz sinusoidal trajectory while tethered to a custom six-axis F/T transducer (N = 7 moths; 999-2,954  
 91 wing strokes per moth; average per moth = 1,950 wing strokes). **d**, EMG (color scheme as above) and

92 yaw torque (black) from 0.5 seconds of flight. **e**, The first two principal components (PCs) of the yaw  
93 torque waveforms captured most of the variance (mean, in black;  $\pm$  S.E.M., in gray;  $N = 7$  moths). **f**,  
94 Projection of yaw torque onto the first two PCs for each wing stroke from a moth ( $w = 2,739$  wing  
95 strokes) in PC space (arbitrary units, *au*). The joint histogram of the distribution is represented in a 10 x  
96 10 grid between -5 and 5 using isoclines from the contour function in MATLAB (MathWorks). **g**, Spike  
97 sorting was accomplished using threshold crossing (e.g. black line) in Offline Sorter (Plexon). Spike rate  
98 is the number of spikes in each wing stroke, and spike timing is the precise spike time relative to the  
99 start of each wing stroke.

## 100 **Spike rate information is present, but timing information is ubiquitous in the** 101 **motor program**

102 We recorded a comprehensive motor program with spike-level resolution across all the primary muscles  
103 actuating the wings in a hawk moth (*Manduca sexta*, N = 7) (Fig. 1a). The hawk moth musculature has  
104 been examined in detail anatomically and through *in vivo* and *in vitro* recordings (see Supplementary  
105 Text). Based on this rich literature we identified and recorded EMG signals from five bilateral pairs of  
106 muscles that have important roles in controlling the wings during flight (Fig. 1b; S1, S2). We  
107 simultaneously obtained within-wing stroke yaw torque using a custom force-torque transducer (ATI)  
108 in tethered flight while the moth visually tracked a robotic flower (Fig. 1c,d) [15, 32]. We segmented our  
109 data into wing strokes, and used principal components analysis (PCA) to reduce the dimensionality of  
110 the yaw torque waveforms. The first two PCs explained most of the variance ( $78.0 \pm 4.0\%$ ) in yaw  
111 torque across wing strokes (Fig. 1e). The visual stimulus elicited variation in the moths' motor output,  
112 sampling a broad range of yaw turns (Fig. 1f). We treated each wing stroke as an independent sample of  
113 the spiking activity as spike rate or spike timing in the 10 muscles and the yaw torque (Fig. 1g).



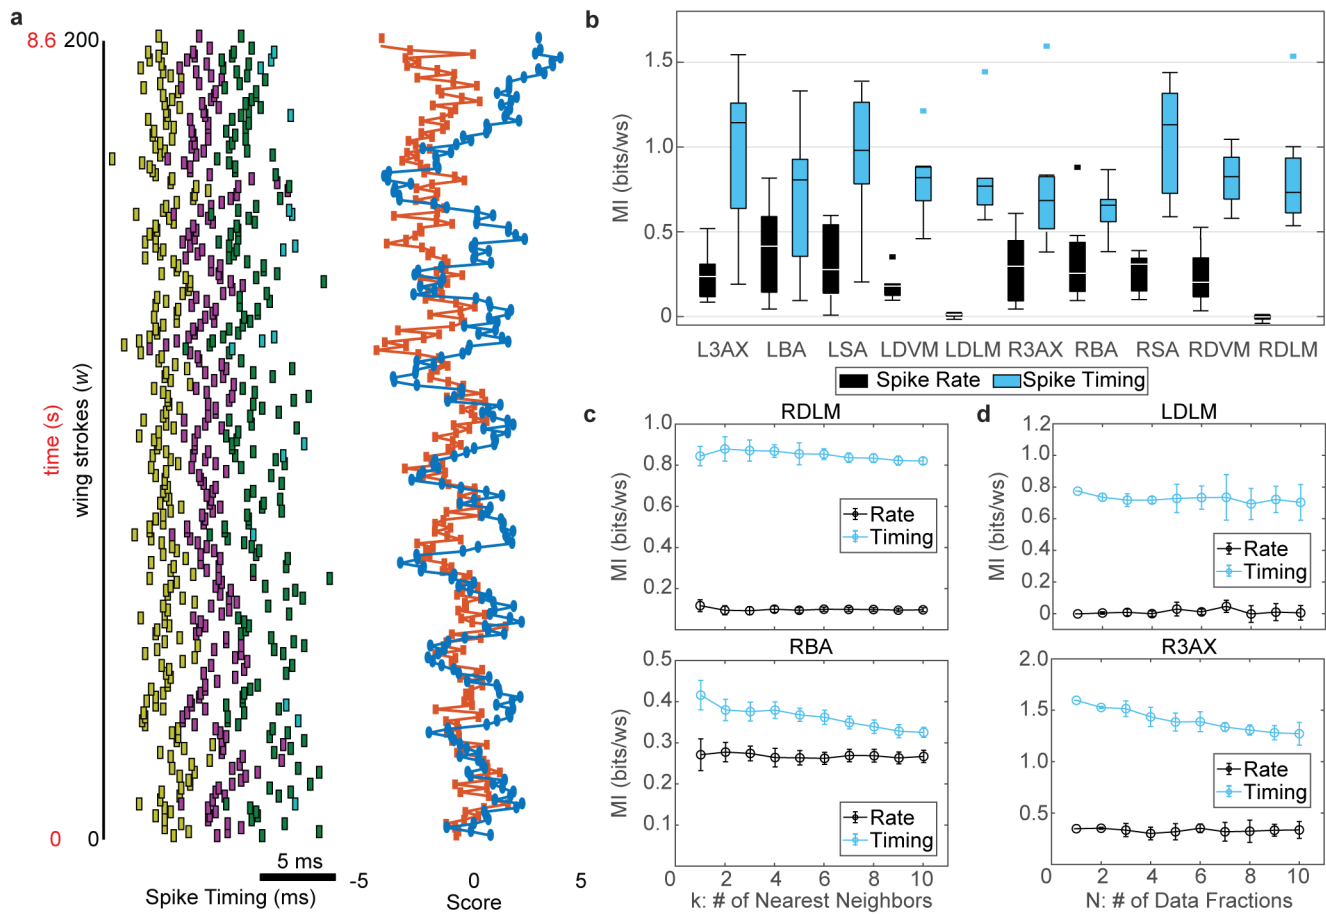

114 **Figure 2 | Mutual information between spike rate or spike timing and yaw torque.** **a**, Timing of  
 115 spikes in the L3AX and PC scores show variability corresponding with the 1 Hz visual stimulus (200  
 116 wing strokes). The rasters are the 1st (yellow), 2nd (purple), 3rd (green), and 4th (light blue) spikes  
 117 within each wing stroke shown alongside the 1st (blue) and 2nd (red) yaw torque PC scores. **b**, MI  
 118 estimates for spike rate (black) and spike timing (blue) with yaw torque across individuals (N = 7). Box  
 119 plots report the median as the center line in the box, which marks the 25th and 75th percentiles.  
 120 Whiskers are range of all points that are not considered outliers (square points). Spike rate MI is less  
 121 than spike timing MI (two-way ANOVA comparing timing vs. rate for all muscles: rate vs. timing, p

122  $< 10^{10}$ ; muscle ID,  $p = 0.26$ ; interaction,  $p = 0.09$ ). Spike timing MI is significantly greater than spike rate  
123 MI in most paired comparisons within muscles (paired t-tests:  $p < 0.02$  for all muscles except the LBA,  $p$   
124  $= 0.09$ , and RBA,  $p = 0.05$ . Wilcoxon signed rank tests:  $p < 0.02$  for all muscles except the LBA,  $p = 0.11$ ,  
125 and RBA,  $p = 0.08$ ). **c**, MI estimates (mean  $\pm$  S.D.) for the number of nearest neighbors  $k = 1-10$  from the  
126 RDLM and RBA muscles of one moth [33, 34]. **d**, MI estimates (mean  $\pm$  S.D.) for data fractions  $N = 1-10$   
127 from the LDLM and R3AX muscles of one moth.

128 Both the spike rate and the timing of individual spikes within the muscles show modulation along with  
129 the motor output (Fig. 2a). To test the separate contributions of rate and temporal encoding in individual  
130 muscles, we estimated the mutual information between muscle activity and yaw torque. We separated  
131 spike rate mutual information (MI) and spike timing MI by conditioning spike timing on spike rate [17]:

$$I(S; \tau) = I(S_r; \tau) + \sum_{i=1}^{S_{r,max}} p(S_r = i) I(S_t; \tau | S_r = i) \quad (1)$$

132 Here,  $I$  corresponds to MI.  $S_r$  corresponds to spike rate, or the total number of spikes in each  
133 wing-stroke.  $\tau$  is the moth's yaw torque represented as the first two PCs.  $i$  represents each spike rate  
134 condition, and  $p(S_r = i)$  is the probability of the spike rate condition. The two terms of this equation  
135 correspond to the spike rate MI and spike timing MI, respectively (see Online Methods). We used the  
136 Kraskov  $k$ -nearest neighbors method to estimate both MI values [33, 34].

137 For all 10 muscles, spike timing MI is higher than spike rate MI for informing yaw torque motor output  
138 (Fig. 2b). In all muscles both spike rate MI and spike timing MI are non-zero, except for the DLM, which  
139 only spikes once per wing stroke during flight (range of mean spike rate MI across 10 muscles = 0.0 - 0.4  
140 bits/wing stroke (ws); spike timing MI = 0.6 - 1 bits/ws). All muscles in the motor program that vary  
141 the number of spikes present in each wing stroke use mixed encoding strategies, combinations of spike  
142 timing and spike rate to inform the torque. The error estimates (see Online Methods) of the MIs were  
143 small compared to the total MI (Table S1, spike rate and timing MI error < 0.04 bits/ws across all  
144 muscles). Our MI estimates are stable across varying values of  $k$ , the number of nearest neighbors, and  
145 the number of data fractions (Fig. 2c,d; S3, S4). In the spike timing MI estimations, 90% of estimations  
146 from halved data sets deviated by less than 10% from the full data set estimate.

147 Temporal encoding is ubiquitous across the entire flight motor program, present in every muscle, and is  
148 utilized more than rate encoding (Fig. 2b). Each motor unit encodes almost an order of magnitude more  
149 information about yaw torque in precise spike timings (0.8 bits/ws on average for all muscles)  
150 compared to other systems, like a cortical vocal area (between 0.1-0.3 bits/syllable) [13] and breathing  
151 muscles (between 0.05-0.2 bits/breath cycle) of song birds [17]. However, the moth's individual motor  
152 units still encode on the order of 1 bit per wing stroke, though they collectively code for the wide variety  
153 of torque behaviors the moths perform.

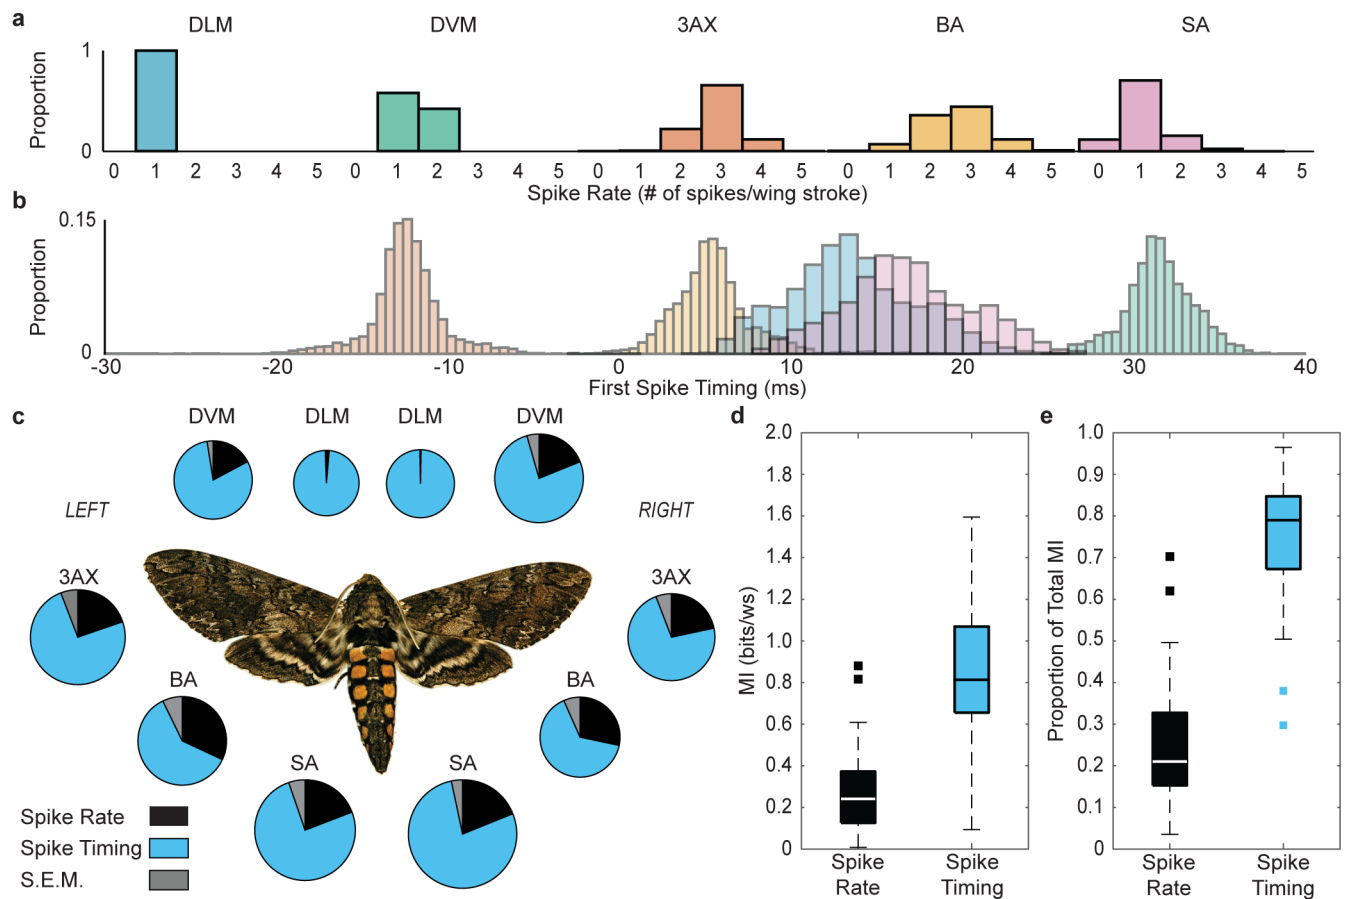

154 **Figure 3 | Consistency of magnitude and proportion of spike timing MI and spike rate MI across all**  
 155 **10 muscles.** **a**, The 5 muscle types we recorded have different probability distributions of spike rate  
 156 conditions (data shown for one moth). **b**, There is variation in the probability distributions of the first  
 157 spike timing across the 5 muscle types (data shown for one moth). Some bursts begin before the wing  
 158 stroke and continue into the wing stroke; these were reported as negative values ( $t = 0$  corresponds to  
 159 the start of the wing stroke). **c**, Mean spike rate and spike timing MI estimates for all 10 muscles across  
 160 individuals ( $N = 7$ ). Pie size indicates the magnitude of total MI, and the slices indicate the proportion  
 161 that is spike rate (black) and spike timing (blue), as well as the S.E.M. these proportions (gray). No

162 significant difference was found in the magnitude of spike rate MI of all muscles excluding the DLM  
163 (one-way ANOVA:  $p = 0.66$ ; Kruskal-Wallis test:  $p = 0.90$ ) or spike timing MI of all muscles (one-way  
164 ANOVA:  $p = 0.54$ ; Kruskal-Wallis test:  $p = 0.39$ ). No significant difference was found in the proportion of  
165 spike timing MI to total MI in all muscles excluding the DLM (one-way ANOVA:  $p = 0.31$ ;  
166 Kruskal-Wallis test:  $p = 0.54$ ). **d,e**, The magnitude or proportion of spike rate MI (black) and spike  
167 timing MI (blue), respectively, across 8 muscles (DLM excluded) and 7 individuals. Boxplots display  
168 data as previously described in Fig. 2b.

## 169 **Encoding strategy is consistent across functionally diverse muscles**

170 Muscles in the hawk moth motor program exhibit extensive diversity in their biomechanical functions.  
171 For example, the main indirect downstroke muscle (dorsolongitudinal muscle, DLM), acts by pulling on  
172 the exoskeleton at each end to contract the thorax. Mechanical strain from the contracting exoskeleton  
173 propagates to the wing hinge and causes the wings to depress [20]. In contrast to the DLM, the third  
174 axillary muscle (3AX) directly affects the wing position by pulling on the third axillary sclerite, which  
175 articulates the anal vein, the most posterior vein of the forewing [31, 35]. In addition to functional  
176 differences, muscles exhibit distinct patterns of variation in their spiking activity. Different muscles have  
177 different ranges of spike count per wing stroke (i.e. spike rate) and different amounts of timing variation  
178 during the wing strokes (Fig. 3a,b).

179 Despite their diverse properties, the 10 muscles in the motor program of the hawk moth are consistent  
180 in the magnitude and proportion of rate and timing information used to encode yaw torque (Fig. 3c). No  
181 muscle carries significantly different spike timing MI. Additionally, all muscles that spike more than  
182 once per wing stroke carry similar amounts of spike rate MI.

183 As a result, there is no significant difference between the 3:1 ratio of spike timing MI to spike rate MI for  
184 all muscles that spike more than once per wing stroke (Fig. 3c-e: mean  $\pm$  S.E.M. of the ratio of spike  
185 timing MI to total MI for all muscles excluding DLM =  $0.75 \pm 0.01$ ). There is evidence that neurons in  
186 the sensory system may use distinct strategies to encode particular types of information [22]. However,  
187 this is not the case in the peripheral motor program for *Manduca sexta*. Despite the differences in

188 biomechanics and firing pattern statistics, muscles in the moth motor program exhibit consistent use of  
189 temporal and rate encoding strategies. The moth's nervous system uses a consistent code for turning  
190 behavior. It may seem surprising that though each muscle has a different probability distribution of  
191 spike rate and spike timing, each muscle has a comparable amount of MI with the moth's torque. The  
192 different probability distributions may indicate that different muscles have varying amounts of total  
193 entropy (bandwidth) while still transmitting the same information. An alternative explanation may be  
194 that different muscle types have comparable total entropies, but they encode torque with varying  
195 temporal and rate precision.



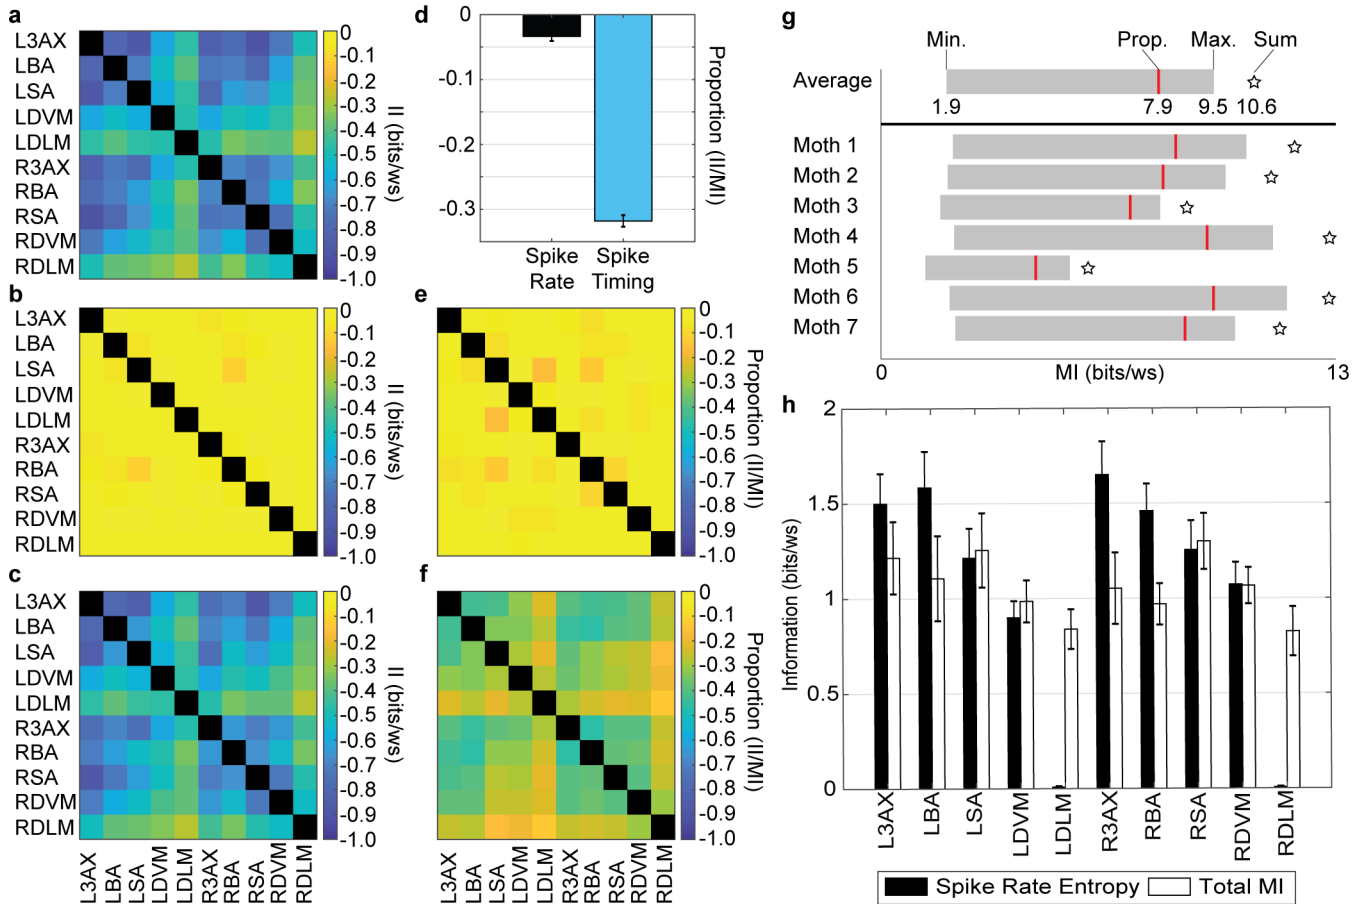

196 **Figure 4 | Interaction information in pairwise combinations of muscles and the range of total motor**  
 197 **program MI values possible. a,** We calculated total interaction information ( $II$ ) (Equation (3)) [36] as a  
 198 measure that compares the estimates of pairwise MI (Equation (2)) and individual muscle MI (Equation  
 199 (1)) for all pairwise combinations of muscles (mean for  $N = 7$  moths). All values of  $II$  are negative,  
 200 indicating net redundant interactions or overlapping information content. Comparisons of muscles to  
 201 themselves are excluded. **b,c** Spike rate interaction information ( $II_{rate}$ ) or spike timing interaction  
 202 information ( $II_{timing}$ ), respectively, across all pairwise combinations of muscles (Equation (7) and (8) in  
 203 Online Methods, mean for  $N = 7$ ). **d,** Proportion of  $II$  to the sum of individual muscle MIs for spike rate

204 and timing terms of equation (7) (mean  $\pm$  S.E.M., all muscle pairs excluding DLMs,  $n = 56$ ). **e,f**, The  
205 proportion of  $II_{rate}$  or  $II_{timing}$  to the sum of the individual spike rate or timing MIs, respectively (mean  
206 for  $N = 7$  individuals). **g**, Estimates of lower and upper bounds of motor program MI (gray box),  
207 proportional estimate of motor program MI (red line), and sum of individual muscle MIs (star) for each  
208 moth and the population average. **h**, Mean  $\pm$  S.E.M. of the spike rate entropy (Equation (9)) and the  
209 total MI ( $N = 7$ ).

## 210 **Coordination is achieved through timing, not rate**

211 Because timing is ubiquitous across all the muscles and encoding strategies are consistent, we next ask  
212 whether the coordination of multiple muscles utilizes primarily rate or temporal encoding, or a mixture  
213 of both. To do this, we first estimated the joint MI between the spiking activity of two muscles and the  
214 yaw torque (see Online Methods):

$$I(S_A, S_B; \tau) = I([S_{A,r} \ S_{B,r}]; \tau) + \sum_{i_A=1}^{S_{A,rmax}} \sum_{i_B=1}^{S_{B,rmax}} p(i_A, i_B) I([S_{A,t} \ S_{B,t}]; \tau | (i_A, i_B)) \quad (2)$$

215 Here,  $S_A$  and  $S_B$  are the spiking patterns from two different muscles.  $S_{A,r}$  and  $S_{B,r}$  represent spike rate  
216 for each of the two muscles.  $S_{A,t}$  and  $S_{B,t}$  represent the spike timing patterns for each muscle.  $i_A$  and  $i_B$   
217 are the spike rate conditions for each muscle. Finally,  $p(i_A, i_B)$  is the joint probability of the spike rate  
218 conditions.

219 Then, we estimated the interaction information ( $II$ ) between two muscles [36]:

$$II = I(S_A, S_B; \tau) - (I(S_A; \tau) + I(S_B; \tau)) \quad (3)$$

220 Here, all variables are the same as defined above. If  $II$  is positive, then it indicates net synergistic  
221 information, or that the two muscles together reduce the entropy of the motor output more than the sum  
222 of their individual contributions. If  $II$  is negative, that indicates that information is net redundant  
223 between the two muscles. Redundancy or negative  $II$  indicates that there is coordination in the  
224 information content between the two muscles.

225 All pairwise combinations of muscles in the motor program have non-zero, negative  $II$  values  
226 (Equation (3)), indicating that there are net redundant interactions (Fig. 4a). We separated the  
227 contributions of rate and timing information to  $II$  as  $II_{rate}$  and  $II_{timing}$  (Equations (7) and (8) in Online  
228 Methods), and found that nearly all the shared information between muscles is encoded in spike timing  
229 (Fig. 4b,c; Supp. Fig. S5). The mean  $\pm$  S.E.M. of the spike rate  $II$  is  $-0.023 \pm 0.003$  bits/ws, while the  
230 mean spike timing  $II$  is  $-0.56 \pm 0.02$  bits/ws. Muscles in the motor program are coordinated (negative  
231  $II$ ) through spike timing and not through spike rate.

232 It is possible that spike timing is more important for coordination than rate simply because spike timing  
233 encodes more information overall. To test this we scaled the spike rate and spike timing interaction  
234 information according to the total magnitude of spike rate and spike timing mutual information.  
235 Overall,  $31.8 \pm 0.9\%$  of spike timing MI and  $3.4 \pm 0.9\%$  of spike rate MI in individual muscles is shared  
236 in pairwise interactions (Fig. 4d). Even considering the smaller magnitude of spike rate MI in individual  
237 muscles, spike rate encodes almost no coordinated information (Fig. 4e,f). Based on how these muscles  
238 interact in pairwise combinations, it appears that rate encoding of each muscle is independent of other  
239 muscles in the motor program.

## 240 **The motor program utilizes less than 10 bits/wing stroke**

241 The significant coordination between muscles and the limited amounts of information in each  
242 individual muscle suggests that the motor program operates with no more than 10 bits of information  
243 per wing stroke. To assess this, we bounded the mutual information conveyed by the entire motor

244 program, taking into account the redundant information in the pairwise combinations of the muscles  
245 (Fig. 4g). Doing MI calculations for greater than 2 muscles is not tractable using the  $k$ -nearest neighbors  
246 method because of increasing data requirements (Supp. Fig. S6,S7). The  $II$  for each combination of  
247 muscles can be subtracted from the motor program to determine upper and lower bounds on motor  
248 program MI, as well as intermediate estimate an overall motor program MI by subtracting the expected  
249 proportion of redundant information (see Online Methods).

250 The comprehensive flight motor program uses a mutual information rate of 1.85 bits/ws to 9.47 bits/ws,  
251 with a best estimate of 7.89 bits/ws (Fig. 4g, mean of  $N = 7$ ). Since the average truncated wing stroke  
252 length used in these calculations was 0.04 s, this equates to an information rate between 46.2 bits/s to  
253 237 bits/s. Lacking other comprehensive motor program recordings it is difficult to compare the total  
254 moth flight program to other systems. Still the motor program of *Manduca* flight is limited to ten motor  
255 output channels each processing only a few bits of information per wing stroke. Complex motor  
256 behavior, like flight control, is accomplished with little information compared to estimates of  
257 information rates in sensory systems. While individual sensory neurons have comparable information  
258 rate to the hawk moth motor units (6-13 bits/s in RGCs [37] and 1-10 bits/s in olfactory receptors [38]),  
259 these systems have orders of magnitude more receptors, so the maximum information rate across the  
260 system is orders of magnitude higher (875,000 bits/s in the guinea pig retina [37]).

261 However in a functional sense this motor output still allows the moth to specify a large number of  
262 possible motor states. To estimate this we determined how many states in the empirical torque  
263 probability density function can be encoded by the total motor program using the direct method (see

264 Online Methods). The range of mutual information rates means the moth can specify its torque to one of  
265 4 to 1076 states during each wing stroke. Clearly, the lower and upper limits are not realistic. The lower  
266 bound MI specifies too few states, while the upper bound MI assumes that all interaction information  
267 across the motor program is the same in all pairwise combinations of muscles. Given the intermediate  
268 estimate between the upper and lower bounds, the motor program MI can specify  $483 \pm 109$  states of  
269 yaw torque (N = 7 individuals) on each wingstroke.

270 We also estimated the entropy in spike rate using the direct method (Equation (9)). Excluding the DLM,  
271 the maximum rate entropy in each muscle was as least as large as the total MI actually encoded (Fig. 4h).  
272 This means that under perfect transmission the motor program could be encoded strictly in rate.

## 273 Discussion

### 274 Shared timing and rate strategies for flight

275 By investigating a comprehensive, spike-resolved motor program, we show that temporal encoding is  
276 not a feature only of specialized motor units, but is an essential control strategy ubiquitously and  
277 consistently utilized for activation and coordination of muscles. There are few, if any, differences in  
278 encoding strategies between the various indirect and direct flight muscles controlling the wings (Fig. 2b,  
279 Fig. 3), despite their different modes of actuation and functional diversity [20]. However, information is  
280 not strictly in timing. All muscles encode information about yaw torque utilizing both precise spike

281 timing and spike rate (Fig. 3c-e), with the exception of the DLMs which only spike once per wing stroke  
282 during flight.

283 The overall strategy of the moth motor program involves individual muscles acting as mixed temporal  
284 and rate encoders. Rate codes can produce graded changes in muscle force and timing codes can change  
285 when and how much force is produced during the wing stroke depending on non-linear muscle  
286 properties, but the translation of the mixed encoding strategy into movement is not this simple[3]. A  
287 simple interpretation of spike rate as proportional to force magnitude is inconsistent with independent  
288 rate codes amongst the muscles in the coordinated motor program (Fig. 4b,e). We expect that different  
289 muscles coordinate their changes in force, yet we do not see coordinated changes in spike rate across  
290 muscles. Moreover the timing of individual muscle action potentials by as little as  $\pm 4$  ms can modulate  
291 the power output of the main downstroke muscle from 0% to 200% of normal [15]. *In situ* preparations  
292 of a wing elevator muscle in a locust, *Schistocerca nitens*, showed that changing either the spike timing or  
293 the number of spikes altered power output [39]. Steering muscles, like the basalar muscle in the blowfly  
294 *Calliphora vicina* can act by dissipating energy rather doing positive work and the timing of activation  
295 can modulate power [40]. By shifting when in the strain cycle a muscle spikes, timing can modulate  
296 force as much as rate in animals from cockroaches [41] to turkeys [42]. The complex transformation of  
297 motor unit spike patterns into force gives plenty of potential for both precise timing and rate to convey  
298 rich information to control movement.

299 An unexpected feature of the comprehensive motor program is the similarity of encoding strategy  
300 across all the motor units (Fig. 3). In contrast to our results, calcium imaging of the direct muscles

301 controlling the wings in flies showed evidence for two categories of muscle encoding: phasic muscles  
302 that are transiently active or tonic muscles that are continuously active [21]. Flies may utilize a  
303 dichotomy of exclusively phasic (rate encoded) and tonic (temporally encoded) muscles organized into  
304 mixed functional groups. In contrast, *Manduca sexta* utilizes individual muscles with mixed encoding  
305 strategies but distinct functions. Flies have multiple similarly sized muscles acting on the same sclerite.  
306 Hawk moths usually have a larger, functionally dominant muscle (or muscles sharing innervation) in  
307 the group of muscles attached to the sclerite (see Supplementary Text). *Drosophila* fly at wing beat  
308 frequencies an order of magnitude higher than *Manduca sexta* and *Schistocerca nitens*. Larger size and  
309 longer wingbeat periods might allow for a single mixed timing and rate motor unit to have more power  
310 to drive the sclerites. Flies also achieve mixed encoding strategies for every functional group of muscles,  
311 but seem to do so by having at least one phasic and one tonic muscle acting on each sclerite [21]. While  
312 phasic and tonic calcium activation does not have the resolution of precise spiking activity, it does show  
313 a separation of timescales and the potential for separated mechanisms for coordination across muscles.  
314 For example, the firing rate of power muscles changes with wing amplitude and phase shifts in the tonic  
315 firing of a basalar muscle correlate with changes in wing kinematics [43].

316 Recording a comprehensive, spike-resolved motor program during behavior is especially feasible in  
317 larger insects because the motor system has a relatively constrained number of motor units. A large  
318 number of spike-resolved motor units has been previously recorded in locusts [44], although an explicit  
319 analysis of temporal and rate encoding has not been done in this system. Each of the motor units in the  
320 moth conveys much more information than is typical in a vertebrate:  $\sim 1$  bit per 40 ms cycle in moth



321 flight (Fig. 2b) vs.  $\sim 0.1$  bit per 400 ms period in songbird respiratory muscle [17]. Vertebrate muscles  
322 tend to have many more motor units than invertebrates. However, even the number of motor units in  
323 vertebrate muscle are typically orders of magnitude fewer than neurons in the brain. We expect that  
324 mixed timing and rate codes will be found in vertebrates and other organisms, and that understanding  
325 the use of shared strategies will improve our ability to interface with neural systems.

### 326 **Timing codes require precise patterning of motor output**

327 Timing codes are inherently limited by precision, both in the degree to which a spike can be reliably  
328 specified by the nervous system and the degree to which it can be reliably translated by the muscle and  
329 skeletal machinery into differential forces [3]. The precise spiking of the indirect flight muscles has  
330 causal and functional consequences for turning down to the sub-millisecond scale [15]. We now  
331 understand that this extends across the entire motor program (Fig. 3b) and that coordination is achieved  
332 primarily through spike timing patterns across muscles (Fig. 2b). Timing codes, even at the millisecond  
333 scale, can have functional consequences for movement because of the non-linear interplay between the  
334 biomechanical properties of the muscle, which vary depending on history and current state, and neural  
335 activating signals [3].

336 Given the relative few spikes per wing stroke, spike count per period is interpreted as a rate code, but  
337 there can be a distinction between rate and spike count in slow bursting motor units with many spikes  
338 per cycle. In the slow cycle frequencies of the crustacean stomatogastric pyloric rhythm and walking  
339 stick insects, muscle force does not strictly follow rate encoding and depends on the specific number of

340 spikes [45]. Nonetheless, even some slow muscles such as the radula closer in *Aplysia* do show force  
341 dependence on specific patterns of spikes [46]. Timing codes are sometimes argued to be precise rate  
342 codes, but that would argue for drastic rate changes in a short time period in single spike codes, like the  
343 one present in the hawk moth DLM, and codes that depend on specific spike patterns [17]. Timing codes  
344 can be distinguished from rate codes by a specific pattern of spikes activated at a precise time in relation  
345 to a behavior[3].

346 It is still unknown how precise temporal motor unit codes arise from higher brain areas, the central  
347 nervous system, and motor circuits in the spinal or ventral nerve cord. Precise motor timing could come  
348 directly from precise sensory encoding via direct connections between sensory receptors and efferent  
349 units. In flies, gap junctions exist between precise haltere mechanoreceptors [47] and steering muscles  
350 [48], producing very fast reflexes, which in conjunction with fast feedback from wing mechanoreceptors,  
351 precisely patterns the activity of the first basalar muscle in *C. vicina* [49]. However these reflexes are still  
352 influenced by visual commands that have to incorporate feedback passing through a number of central  
353 nervous system synapses [50]. In locusts, mechanical feedback from the tegula, a sensory organ  
354 depressed during each wing stroke, produces phase resetting in the flight motor pattern which helps  
355 coordinate the fore and hind wings [51]. In moths, there are rapid mechanosensory pathways from the  
356 antenna [52], wings[53] and potentially other organs that can provide reafference of movement that  
357 could be used in timing. However the apparent millisecond scale resolution of the motor code poses a  
358 challenge even for neural processing that requires only a few synapses.

359 It is possible that precision exists even in central brain regions. Some pairs of bilateral muscles in  
360 *Drosophila* are innervated by motor neurons that receive input from the same circuitry in the nerve cord  
361 [54] which could give a proximal source of the left-right precision seen in *Manduca* downstroke muscles  
362 [15], but this alone is unlikely to be sufficient to account for the extent of timing codes. Central brain  
363 regions have typically been thought to encode information primarily by rate, but a cortical area for  
364 vocalization in song birds does show millisecond scale precision in encoding [13]. Precision in the  
365 peripheral motor system may also come from transforming a population code or remapping of  
366 dynamics distributed over large populations of neurons [24]. Both the central nervous system and rapid  
367 sensorimotor pathways in the periphery provide potential mechanisms for spike timing precision.

## 368 **The importance of timing in motor control**

369 The prevalence of temporal coding in the moth motor program is not merely due to a limitation in how  
370 much information can be encoded in spike rate, since the spike rate entropy reported was high enough  
371 to account for the total mutual information encoded by each individual muscle that spiked more than  
372 once per wing stroke (Fig. 4h). For the DVM and SA muscles, spike rate would have to have no  
373 transmission error due to its entropy being similar in magnitude to the total MI, but for the 3AX and BA  
374 muscles, there could be transmission error and the spike rate would still account for the total MI. The  
375 only muscle in the hawk moth flight motor program where the bandwidth of rate encoding is  
376 necessarily limiting was in the DLM, which cannot encode spike rate information since it activates only  
377 once per wing stroke.

378 While temporal codes are present both in faster, high frequency systems and slower, low frequency  
379 systems [3], rate is still utilized. The contribution of variable spike rate may be that it enables higher  
380 bandwidth for conveying temporal information due to having more spikes where the timing can vary,  
381 provided the motor program again has sufficient precision. Neural prosthetic devices and  
382 brain-machine-interfaces have led to improved algorithms for decoding motor implications of neural  
383 activity on a single-trial-basis [24, 55]. Such methods frequently assume that neural activity translates to  
384 motor behavior via a rate code. Since spike timing contains much more information than spike rate in  
385 every single muscle examined in a comprehensive motor program, incorporating spike timing or  
386 pattern information shows promise for improving decoding algorithms.

387 Analysis of rate alone may miss important structure in how brains pattern movement. For example,  
388 coordination of movement is achieved through the timing of muscle activation across a motor program,  
389 providing evidence which supports the existence of coordination specific to spike timing. Previous  
390 investigations of muscle synergies could not assess coordination at the spike level, though timing of  
391 muscle activation was an important component of the synergies identified in frogs, cats, and humans  
392 [25, 56, 57]. However, a majority of the information used to coordinate muscles may be overlooked by  
393 not considering spike timing. Not all information encoded by individual muscles was shared,  
394 supporting some measure of independent timing encoding and nearly entirely independent rate  
395 encoding (Fig. 4b). Accounting for shared information between muscles reduces the information in the  
396 comprehensive motor program, but still enables the encoding of 100s of unique states.

397 Sequences of muscle timings can also coordinate to reconfigure the motor system from one behavior to  
398 the another. This occurs during the transition from chewing to swallowing in *Aplyia*. The sea slug uses  
399 the same motor units to accomplish both behaviors but can switch between them with a shift in timing  
400 of muscle activation that is highly sensitive because the mechanical system is poised at a critical point in  
401 its dynamics [58]. In the moth motor program each muscle has a small amount of independent motor  
402 information it can convey with rate, while control encoded in timing is coordinated across multiple  
403 muscles. Reconfiguration of the motor system for different tasks may not require different levels of  
404 activation or change in rate, but rather changes in overall coordination of patterns in precise spike  
405 timings.

406 Millisecond level changes in the timing of neural firing have been shown in many different species to  
407 alter behavioral output [13–15]. Millisecond control acts on longer time scales over the course of  
408 cockroach strides [41], decision commands in fly escape flight [16], and in bird respiratory motor units  
409 [17]. Timing encoding in the most peripheral motor output may be the rule rather than exception and at  
410 least in moths also underlies how muscles form coordinated groups. Temporal encoding is not only  
411 relevant for single muscles, but is an essential control strategy consistently utilized for coordination and  
412 activation of muscles in a complete motor program.

413

## References

- 414 1. Theunissen, F. & Miller, J. P. Temporal encoding in nervous systems: A rigorous definition. *Journal*  
415 *of Computational Neuroscience* **2**, 149–162 (1995).

- 416 2. Gerstner, W., Kreiter, a. K., Markram, H. & Herz, a. V. Neural codes: firing rates and beyond.  
417 *Proceedings of the National Academy of Sciences of the United States of America* **94**, 12740–12741 (1997).
- 418 3. Sober, S. J., Sponberg, S., Nemenman, I. & Ting, L. H. Millisecond spike timing codes for motor  
419 control. *Trends in Neurosciences* **41**, 644–648 (2018).
- 420 4. Birmingham, J. T., Szuts, Z. B., Abbott, L. F. & Marder, E. Encoding of muscle movement on two  
421 time scales by a sensory neuron that switches between spiking and bursting modes. *Journal of*  
422 *Neurophysiology* **82**, 2786–2797 (1999).
- 423 5. deCharms, R. C. & Merzenich, M. M. Primary cortical representation of sounds by the coordination  
424 of action-potential timing. *Nature* **381**, 610–613 (1996).
- 425 6. Reinagel, P. & Reid, R. C. Temporal coding of visual information in the thalamus. *Journal of*  
426 *Neuroscience* **20**, 5392–5400 (2000).
- 427 7. Mackevicius, E. L., Best, M. D., Saal, H. P. & Bensmaia, S. J. Millisecond precision spike timing  
428 shapes tactile perception. *Journal of Neuroscience* **32**, 15309–15317 (2012).
- 429 8. Lawhern, V., Nikonov, A., Wu, W. & Contreras, R. Spike rate and spike timing contributions to  
430 coding taste quality information in rat periphery. *Frontiers in Integrative Neuroscience* **5**, 1–14 (2011).
- 431 9. Egea-Weiss, A., Renner, A., Kleineidam, C. J. & Szyszka, P. High precision of spike timing across  
432 olfactory receptor neurons allows rapid odor coding in *Drosophila*. *iScience* **4**, 76–83 (2018).
- 433 10. Bülbring, E. Correlation between membrane potential, spike discharge, and tension in smooth  
434 muscle. *Journal of Physiology* **128**, 200–221 (1955).
- 435 11. Milner-Brown, H. S., Stein, R. B. & Yemm, R. Changes in firing rate of human motor units during  
436 linearly changing voluntary contractions. *The Journal of Physiology* **230**, 371–390 (1973).
- 437 12. Ferster, D. & Spruston, N. Cracking the neuronal code. *Science* **270**, 756–757 (1995).
- 438 13. Tang, C., Chehayeb, D., Srivastava, K., Nemenman, I. & Sober, S. J. Millisecond-scale motor  
439 encoding in a cortical vocal area. *PLoS Biology* **12**, e1002018 (2014).
- 440 14. Suvrathan, A., Payne, H. L. & Raymond, J. L. Timing rules for synaptic plasticity matched to  
441 behavioral function. *Neuron* **92**, 959–967 (2016).
- 442 15. Sponberg, S. & Daniel, T. L. Abdicating power for control: a precision timing strategy to modulate  
443 function of flight power muscles. *Proceedings of the Royal Society B: Biological Sciences* **279**, 3958–3966  
444 (2012).
- 445 16. Von Reyn, C. R. *et al.* A spike-timing mechanism for action selection. *Nature Neuroscience* **17**,  
446 962–970 (2014).
- 447 17. Srivastava, K. H. *et al.* Motor control by precisely timed spike patterns. *Proceedings of the National*  
448 *Academy of Sciences of the United States of America* **114**, 1171–1176 (2017).
- 449 18. Dickinson, M. H. & Tu, M. S. The Function of Dipteran Flight Muscle. *Comparative Biochemistry and*  
450 *Physiology Part A: Physiology* **116**, 223–238 (1997).
- 451 19. Burrows, M. *The Neurobiology of an Insect Brain Ch. 11* (Oxford University Press, Oxford, 1996).
- 452 20. Kammer, A. E. *Flying in Comprehensive Insect Physiology, Biochemistry and Pharmacology* (Oxford:  
453 Pergamon Press, Oxford, 1985).

- 454 21. Lindsay, T., Sustar, A. & Dickinson, M. The function and organization of the motor system  
455 controlling flight maneuvers in flies. *Current Biology* **27**, 345–358 (2017).
- 456 22. Jamali, M., Chacron, M. J. & Cullen, K. E. Self-motion evokes precise spike timing in the primate  
457 vestibular system. *Nature Communications* **7**, 1–14 (2016).
- 458 23. Ting, L. H. Dimensional reduction in sensorimotor systems: a framework for understanding  
459 muscle coordination of posture. *Progress in Brain Research* **165**, 299–321 (2007).
- 460 24. Churchland, M. M. *et al.* Neural Population Dynamics During Reaching. *Nature* **487**, 1–20. ISSN:  
461 1878-5832 (2012).
- 462 25. d’Avella, A., Saltiel, P. & Bizzi, E. Combinations of muscle synergies in the construction of a natural  
463 motor behavior. *Nature Neuroscience* **6**, 300–308 (2003).
- 464 26. Ivanenko, Y. P., Poppele, R. E. & Lacquaniti, F. Five basic muscle activation patterns account for  
465 muscle activity during human locomotion. *Journal of Physiology* **556**, 267–282 (2004).
- 466 27. Usherwood, P. The nature of ‘slow’ and ‘fast’ contractions in the coxal muscles of the cockroach. **8**,  
467 31–52 (1962).
- 468 28. Rheuben, M. B. Quantitative comparison of the structural features of slow and fast neuromuscular  
469 junctions in *Manduca*. *Journal of Neuroscience* **5**, 1704–1716 (1985).
- 470 29. Kammer, A. E. The motor output during turning flight in a hawkmoth, *Manduca sexta*. *Journal of*  
471 *Insect Physiology* **17**, 1073–1086 (1971).
- 472 30. Kammer, A. E. & Nachtigall, W. Changing phase relationships among motor units during flight in  
473 a saturniid moth. *Journal of Comparative Physiology* **83**, 17–24 (1973).
- 474 31. Rheuben, M. & Kammer, A. Structure and innervation of the third axillary muscle of *Manduca*  
475 relative to its role in turning flight. *Journal of Experimental Biology* **131**, 373–402 (1987).
- 476 32. Sponberg, S., Dyhr, J. P., Hall, R. W. & Daniel, T. L. Luminance-dependent visual processing enables  
477 moth flight in low light. *Science* **348**, 1245–1248 (2015).
- 478 33. Kraskov, A., Stögbauer, H. & Grassberger, P. Estimating mutual information. *Physical Review E -*  
479 *Statistical, Nonlinear, and Soft Matter Physics* **69**, 066138 (2004).
- 480 34. Holmes, C. M. & Nemenman, I. Estimation of mutual information for real-valued data with error  
481 bars and controlled bias. *arXiv*. doi:arXiv:1903.09280[q-bio.QM] (2019).
- 482 35. Eaton, J. L. *Lepidopteran Anatomy* (John Wiley & Sons Limited, Hoboken, NJ, 1988).
- 483 36. Timme, N., Alford, W., Flecker, B. & Beggs, J. M. Synergy, redundancy, and multivariate  
484 information measures: An experimentalist’s perspective. *Journal of Computational Neuroscience* **36**,  
485 119–140. ISSN: 15736873 (2014).
- 486 37. Koch, K. *et al.* How much the eye tells the brain. *Current Biology* **16**, 1428–1434 (2006).
- 487 38. Juusola, M. & Song, Z. How a fly photoreceptor samples light information in time. *Journal of*  
488 *Physiology* **595**, 5427–5437 (2017).
- 489 39. Mizisin, A. P. & Josephson, R. K. Mechanical power output of locust flight muscle. *Journal of*  
490 *Comparative Physiology A: Neuroethology, Sensory, Neural, and Behavioral Physiology* **160**, 413–419  
491 (1987).



- 492 40. Tu, M. S. & Dickinson, M. H. Modulation of negative work output from a steering muscle of the  
493 blowfly *Calliphora vicina*. *Journal of Experimental Biology* **192**, 207–224 (1994).
- 494 41. Sponberg, S., Spence, A. J., Mullens, C. H. & Full, R. J. A single muscle's multifunctional control  
495 potential of body dynamics for postural control and running. *Philosophical Transactions Of The Royal*  
496 *Society Of London Series B-Biological Sciences* **366**, 1592–1605 (2011).
- 497 42. Roberts, T. J., Marsh, R. L., Weyland, P. G. & Taylor, C. R. Muscular force in running turkeys: the  
498 economy of minimizing work. *Science* **275**, 1113–1115 (1997).
- 499 43. Tu, M. & Dickinson, M. The control of wing kinematics by two steering muscles of the blowfly  
500 (*Calliphora vicina*). *Journal of Comparative Physiology A* **178**, 813–830 (1996).
- 501 44. Zarnack, W. & Möhl, B. Activity of the direct downstroke flight muscles of *Locusta migratoria* (L.)  
502 during steering behaviour in flight. *Journal of Comparative Physiology A: Neuroethology, Sensory,*  
503 *Neural, and Behavioral Physiology* **118**, 215–233 (1977).
- 504 45. Hooper, S. L., Guschlbauer, C., von Uckermann, G. & Büschges, A. Different motor neuron spike  
505 patterns produce contractions with very similar rises in graded slow muscles. *Journal of*  
506 *Neurophysiology* **97**, 1428–1444 (2006).
- 507 46. Zhurov, Y. & Brezina, V. Variability of motor neuron spike timing maintains and shapes  
508 contractions of the accessory radula closer muscle of *Aplysia*. *Journal of Neuroscience* **26**, 7056–7070  
509 (2006).
- 510 47. Fox, J. L., Fairhall, A. L. & Daniel, T. L. Encoding properties of haltere neurons enable motion  
511 feature detection in a biological gyroscope. *Proceedings of the National Academy of Sciences of the*  
512 *United States of America* **107**, 3840–3845 (2010).
- 513 48. Fayyazuddin, A. & Dickinson, M. H. Haltere afferents provide direct, electrotonic Input to a  
514 steering motor neuron in the blowfly, *Calliphora*. *Journal of Neurosciences* **16**, 5225–5232 (1996).
- 515 49. Fayyazuddin, A. & Dickinson, M. H. Convergent mechanosensory input structures the firing phase  
516 of a steering motor neuron in the blowfly, *Calliphora*. *Journal of Neurophysiology* **82**, 1916–1926  
517 (1999).
- 518 50. Chan, W. P., Prete, F. & Dickinson, M. H. Visual input to the efferent control system of a fly's  
519 "gyroscope". *Science* **280**, 289–292 (1998).
- 520 51. Wolf, H. The locust tegula: significance for flight rhythm generation, wing movement control and  
521 aerodynamic force production. *Journal of Experimental Biology* **182**, 229–253 (1993).
- 522 52. Sane, S. P., Dieudonné, A., Willis, M. A. & Daniel, T. L. Antennal mechanosensors mediate flight  
523 control in moths. *Science* **315**, 863–866 (2007).
- 524 53. Pratt, B., Deora, T., Mohren, T. & Daniel, T. L. Neural evidence supports a dual sensory-motor role  
525 for insect wings. *Proceedings of the Royal Society B: Biological Sciences* **284**, 20170969 (2017).
- 526 54. Sadaf, S., Reddy, O. V., Sane, S. P. & Hasan, G. Neural control of wing coordination in flies. *Current*  
527 *Biology* **25**, 80–86 (2015).
- 528 55. Pandarinath, C. *et al.* Inferring single-trial neural population dynamics using sequential  
529 auto-encoders. *Nature Methods*, 805–815 (2018).
- 530 56. Ting, L. H. & Macpherson, J. M. A limited set of muscle synergies for force control during a  
531 postural task. *Journal of Neurophysiology* **93**, 609–613 (2005).



- 532 57. Clark, D. J., Ting, L. H., Zajac, F. E., Neptune, R. R. & Kautz, S. A. Merging of healthy motor  
533 modules predicts reduced locomotor performance and muscle coordination complexity post-stroke.  
534 *Journal of Neurophysiology* **103**, 844–857 (2009).
- 535 58. Ye, H., Morton, D. W. & Chiel, H. J. Behavioral/systems/cognitive neuromechanics of  
536 multifunctionality during rejection in *Aplysia californica*. *Journal of Neuroscience* **26**, 10743–10755  
537 (2006).

## End Notes

538

539 **Acknowledgements** The authors thank Mark Willis, Tom Daniel, Ilya Nemenman, and Sam Sober  
540 for helpful discussions. This material is based upon work supported by the National Science Foundation  
541 Graduate Research Fellowship under Grant No. DGE-1650044 and Grant No. DGE-1444932. This work  
542 was also supported by an NSF CAREER (PoLS – 1554790) to SS and a Klingenstein-Simons Fellowship  
543 in the Neurosciences to SS.

544 **Author Contributions** RC and SS developed experimental techniques. RC and JP conducted  
545 electrophysiological experiments. RC did spike sorting analysis. JP did data analysis. RC, JP, and SS  
546 wrote paper and made figures.

547 **Competing Interests** The authors declare no competing interests.

548

## Online Methods

549 **Animals.** Moths (*Manduca sexta*) were obtained as pupae (University of Washington colony) and  
550 housed communally after eclosion with a 12-hour light-dark cycle. Naïve males and females (N = 7)  
551 were used in experiments conducted during the dark period of their cycle.

552 **Electromyography (EMG) recordings from flight muscles.** Moths were cold anesthetized before  
553 removing scales from the ventral and dorsal sides of their thoraxes. We made two small holes in the  
554 cuticle using insect pins and inserted two silver EMG wires to take differential recordings from the  
555 indirect power muscles and direct steering muscles on each side of the animal (Supp. Fig. S1). These 5  
556 pairs of muscles together comprise a nearly complete motor program for hawk moth flight (see  
557 Supplementary Text). A common ground wire was placed in the abdomen.

558 **Imaging of flight muscles.** We imaged external placement of silver EMG wires to ensure we  
559 targeted the correct muscles (Supp. Fig. S2). We also conducted post-mortem dissections on a subset of  
560 animals to verify our placement of EMG wires. All images were captured with a Zeiss Stereo Discovery  
561 v.12 equipped with a Zeiss Axiocam 105 color camera.

562 **Experimental set-up.** We tethered moths with cyanoacrylate glue to a 3D-printed ABS plastic rod  
563 that was rigidly attached to a custom-made six-axis force-torque (F/T) transducer (ATI Nano17,

564 FT20157; calibrated ranges:  $F_x, F_y = \pm 1.00$  N;  $F_z = \pm 1.80$  N;  $\tau_x, \tau_y, \tau_z = \pm 6250$  mN-mm). After tethering  
565 the moths, they were given 30 minutes to adapt to dark light conditions and recover from the surgery at  
566 room temperature before starting experimental recordings. Signals from the EMG wires were amplified  
567 using a 16-channel AC amplifier (AM Systems Inc., Model 3500) before acquisition with a NI USB-6259  
568 DAQ board. Gauge voltages from the F/T transducer were also acquired with a second NI USB-6259  
569 DAQ board. Both the EMG and F/T transducer gauge voltages were sampled at 10000 Hz. Outputs  
570 from these DAQ boards were captured using MATLAB (MathWorks). F/T transducer voltages were  
571 transformed into force and torque values on axes centered at the point of attachment of the moth to the  
572 tether (the dorsal surface of the thorax).

573 **Visual stimulus.** An artificial robotic flower was used to provide visual stimulus to the moth  
574 during recording, as in previous studies of hawk moth flight control[1, 2]. The flower was actuated in a  
575 purely horizontal, 1 Hz sinusoidal trajectory using precisely controlled servo motors (Phidgets, Inc.)  
576 connected to a 12 V DC power supply. We only considered trials where the moth was tracking the  
577 robotic flower. Different patterns of muscle activity have been observed for different types of behaviors,  
578 so controlling for tracking flight was necessary to ensure that we were consistent in the motor strategy  
579 we were recording and analyzing[3, 4]. To determine whether the moth was tracking the flower, we  
580 recorded high speed video at 250 fps above the moth (FASTEC IL4; 50 mm lens). The working arena was  
581 illuminated with an 850-nm IR light (Larson Electronics). Black fabric and poster board were used to  
582 isolate the arena around the moth. We identified a tracking response based on the head motion,  
583 abdomen motion, and wing kinematics of the tethered moth in response to the flower's motion. For the

584 trials where a visual tracking response was present, we computed the power spectral density of the yaw  
585 torque that the moth produced to determine whether a peak at 1 Hz was present, which would indicate  
586 coherent motion with the flower. To ensure that this peak was not an artifact of the flower motion or  
587 other mechanical elements of our experimental set-up, we carefully isolated the F/T transducer from the  
588 robotic flower, speakers, and other vibrating machines in the experimental room.

589 **Analysis of spike trains.** We utilized Offline Sorter (OFS; Plexon) to detect the precise timing of  
590 spiking events in the EMG recordings from the 10 muscles. This program utilized a mixed detection  
591 method which first applied a threshold crossing method, and then identified the peak in a short time  
592 window after threshold crossing. OFS documented the timing of the threshold crossing of each spike.  
593 We manually supervised the threshold value, waveform length, and deadtime (inter-spike interval) to  
594 maintain accuracy of detection. We visually verified accurate and consistent spike detection. We  
595 combined trials from the same individual for mutual information (MI) analysis. For instances where  
596 multiple signals were present on a single channel, we compared the raw signals from multiple channels.  
597 We cross-referenced the literature considering typical shape and phase of each muscle signal (see  
598 Supplementary Text and Fig. S1) [3–7]. When necessary, we also high pass filtered data using a 4th order  
599 Butterworth filter with a 100 Hz cutoff.

600 **Wing stroke alignment.** The strain gauge voltages from the F/T transducer were transformed to  
601 calibrated forces and torques and translated to the point of attachment of the moth to the tether. Timings  
602 of muscle spikes during a wing stroke were referenced to the peak downward force in the z-direction

603 during each wing stroke cycle, which corresponded approximately to the zero-phase crossing of the yaw  
604 torque. The phase crossing was determined by filtering  $F_z$  with an 8th order Type II Chebychev filter  
605 with a pass band of 3-35 Hz, which captures the natural wing beat frequency of *M. sexta*, which in  
606 tethered preparations is approximately 20 Hz. Using this alignment, we segmented both the torque and  
607 EMG data into wing strokes. For all following analyses, the raw yaw torque signal was low-pass filtered  
608 with a 4th order Butterworth filter with a cutoff frequency of 1000 Hz.

609 **Mutual information.** While we sampled the yaw torque at 10000 Hz, we did not use all sample  
610 points in our MI estimates. To reduce the dimensionality of the yaw torque in each wing stroke, we did a  
611 principle components analysis (PCA) on the torque waveforms within each individual. The length of the  
612 waveforms was cut off at the length of the smallest duration wing stroke in each individual. An  
613 alternative sampling method was also tested where wing strokes were phase-normalized, and the yaw  
614 torque was sampled at several phases during the wing stroke. Both methods give similar results. We  
615 used the resulting scores of the first 2 principal components (PCs) in the MI estimation.

616 To determine the relative importance of rate and temporal encoding, we implemented a Kraskov  
617  $k$ -nearest neighbors method of estimating MI previously used to analyze spikes from breathing muscles  
618 in songbirds [8–10]. This method estimates the spike rate MI before calculating additional spike timing  
619 MI using this formulation:

$$I(S; \tau) = I(S_r; \tau) + \sum_{i=1}^{S_{r,max}} p(S_r = i) I(S_t; \tau | S_r = i) \quad (4)$$

620 The neural signals present in both the rate and temporal codes of the spiking activity is  $S$ , and the yaw  
621 torque PCs are represented by the  $w \times 2$  matrix  $\tau$ , where  $w$  is the number of wing strokes. The first term  
622 in the equation is the spike rate MI, which measures the MI between the yaw torque  $\tau$  and the  $w \times 1$   
623 matrix  $S_r$ , which represents the number of spikes in each wing stroke  $w$ . The last term in the equation is  
624 the spike timing MI, which is the weighted sum of MI estimates between the yaw torque  $\tau$  and the spike  
625 timings  $S_t$ , a  $w \times i$  matrix of the wing strokes where the spike count is equal to  $i$ . The maximum value of  
626 the spike count condition in all wing strokes is  $S_{r,max}$ . The estimates are weighted by the probability  
627  $p(S_r = i)$  for each spike count condition  $i$ .

628 The Kraskov  $k$ -nearest neighbors method of MI estimation relies on the selection of an appropriate  
629 number of nearest neighbors  $k$  [8–10]. To choose the value of  $k$  (the number of nearest neighbors) for our  
630 estimation, we estimated the MI across different values of  $k$ . In most cases our estimates were  
631 insensitive to choice of  $k$  (Supp. Fig. S3), but in some case too small of a  $k$  creates unstable estimates of  
632 MI. We chose  $k = 4$  because it was the smallest value of  $k$  where estimates became stable in both  $k$ -space  
633 (Supp. Fig. S3). In data fractioning, 90% of muscles in all moths provided stable MI estimates in when  
634 the data sizes were halved (Supp. Fig. S4). A few particular incidences require the full data (example is  
635 S4), but the conclusion across muscles and moths were robust to data size. For all spike timing MI  
636 estimations, any spike count condition that occurred in less than  $k+1$  wing strokes or fewer wing strokes  
637 than the dimensionality of  $S_t$  or  $\tau$  were not included in the summation.

638 We estimated error in our spike rate MI estimates using the variance of  $I(S_r, \tau)$  estimates in  
639 non-overlapping fractions (for  $N = 1-10$ , data split into equal  $1/N$  sets) of each individual moth's data

640 set. To estimate error in spike timing MI estimates, using the same data fractioning described above, we  
 641 found the variance of each calculation  $I(S_t, \tau|i)$  and then propagated the error through the weighted  
 642 mean of  $p(S_r = i)$ . Note that this method assumes no error in our estimation of the probability of each  
 643 spike rate condition. All the error estimates we found are at least an order of magnitude lower than the  
 644 MI values, and are lower than the S.E.M. across individuals for all cases except the estimation of  $I(S_r, \tau)$   
 645 for the DLMs, which approach  $I = 0$  (Supp. Table 1).

646 **Pairwise MI and interaction information.** To investigate how MI is encoded across muscles, we  
 647 estimated the joint mutual information between different pairwise combinations of muscles and the yaw  
 648 torque response:

$$I(S_A, S_B; \tau) = I([S_{A,r} S_{B,r}]; \tau) + \sum_{i_A=1}^{S_{A,rmax}} \sum_{i_B=1}^{S_{B,rmax}} p(i_A, i_B) I([S_{A,t} S_{B,t}]; \tau | (i_A, i_B)) \quad (5)$$

649  $I(S_A, S_B; \tau)$  is the pairwise MI, or the mutual information between the torque and the joint spiking  
 650 activity of one muscle,  $S_A$ , and another muscle,  $S_B$ . The first term is the pairwise spike rate MI, the  
 651 mutual information between the number of spikes in each wing stroke of each pair of muscles ( $S_{A,r}$  and  
 652  $S_{B,r}$ ) and the yaw torque PCs,  $\tau$ . The second term is the pairwise spike timing MI, the weighted sum of  
 653 pairwise MI estimates between the yaw torque  $\tau$  and the spike timings of each muscle ( $S_{A,t}$  and  $S_{B,t}$ )  
 654 where the spike count in the first muscle is  $i_A$  and the spike count in the second muscle is  $i_B$ .  $S_{A,rmax}$  and  
 655  $S_{B,rmax}$  are the maximum value of the spike count condition for the first and second muscles,  
 656 respectively. The estimates are weighted by the joint probability  $p(i_A, i_B)$  of each possible pairwise spike  
 657 count condition. As in the individual MI estimations, we used a value of  $k = 4$  (Supp. Fig. S6). The



658 pairwise spike timing MI estimations did not include any joint spike count conditions that occurred in  
659 less than  $k+1$  wing strokes or fewer wing strokes than the dimensionality of  $[S_{A,t}S_{B,t}]$ .

660 We estimated error in our pairwise spike rate MI estimates using the variance of  $I([S_{r,A} S_{r,B}], \tau)$  and the  
661 same methods as our individual muscle MI estimates (Supp. Fig. S6, S7). To estimate error in pairwise  
662 spike timing MI estimates, using the same data fractioning described above, we found the variance of  
663 each calculation of the second term of the pairwise MI equation (Equation (5)) and then propagated the  
664 error through the weighted mean of  $p(i_A, i_B)$ . All the error estimates we found are again at least an order  
665 of magnitude lower than the pairwise MI values, and are lower than the S.E.M. across individuals (Supp.  
666 Table 2).

667 To compare the pairwise MI and individual muscle MIs, we used an interaction information measure  
668 [11]:

$$II = I(S_A, S_B; \tau) - (I(S_A, \tau) + I(S_B, \tau)) \quad (6)$$

669  $II$  is the interaction information, which is the difference between the pairwise MI  $I(S_A, S_B; \tau)$  (Equation  
670 (5)) and the sum of the individual muscle MIs (Equation (4)) for muscles A and B. If  $II > 0$ , then the  
671 pairwise MI is larger than the sum of the individual muscle MIs, and the interaction between these  
672 muscles is net synergistic in their prediction of yaw torque. There is more information present when the  
673 activity of both muscles are known together compared with when they are known separately. If  $II < 0$ ,  
674 then the sum of the individual muscle MIs is larger than the pairwise MI, and the interaction between  
675 these muscles is net redundant in their prediction of the yaw torque. There is overlapping or shared  
676 information present when the activity of both muscles are known together.

677 We also calculated this measure for separated spike rate  $II$  and spike timing  $II$ . The spike rate  
678 interaction information is:

$$II_{rate} = I([S_{A,r} S_{B,r}], \tau) - (I(S_{A,r}, \tau) + I(S_{B,r}, \tau)) \quad (7)$$

679 This equation takes the spike rate terms from both the pairwise MI estimate (Equation (5)) and the  
680 individual muscle MI estimates (Equation (4)). In the same way, the spike timing interaction information  
681 is:

$$II_{timing} = \sum_{i_A=1}^{S_{A,rmax}} \sum_{i_B=1}^{S_{B,rmax}} p(i_A, i_B) I([S_{A,t} S_{B,t}], \tau | (i_A, i_B)) - \left( \sum_{i_A=1}^{S_{A,rmax}} p(i_A) I(S_{A,t}, \tau | i_A) + \sum_{i_B=1}^{S_{B,rmax}} p(i_B) I(S_{B,t}, \tau | i_B) \right) \quad (8)$$

682 Similarly to the full  $II$ , positive values of  $II_{rate}$  and  $II_{timing}$  indicate net synergistic interactions between  
683 muscles 1 and 2 and negative values indicate net redundant interactions between muscles 1 and 2.

684 **Spike rate entropy and total motor program information.** We estimated the entropy of spike rate  
685 using the direct method ([12, 13]):

$$H_r = - \sum_{i=1}^{S_{r,max}} p(S_r = i) \log_2(p(S_r = i)) \quad (9)$$

686 This direct method estimates the entropy by the probability of each discrete state of the spike rate  
687 condition  $S_r = i$  up to the maximum value of the spike rate,  $S_{r,max}$ . The entropy is maximized by a  
688 uniform distribution, and minimized if only one state or value of spike rate is present in the data.

689 To estimate the amount of information present in the motor program, we first calculated the sum of the  
690 total MI estimates of all muscles for each individual. This value does not account for redundancy, and

691 therefore is an overestimation of the actual amount of information present in the motor program. We  
692 used three methods to determine a range of possible values for the total motor program MI. The  
693 minimum, lower bound on the total motor program MI was calculated assuming all interaction  
694 information values represented independent shared information, so that the maximum possible amount  
695 of interaction information was subtracted from the sum of the individual muscle MIs. The maximum,  
696 upper bound on total program MI,  $MI_{max}$ , was calculated assuming all interaction information values  
697 represented dependent shared information, so only the highest redundancy value was subtracted from  
698 the sum of the individual muscle MIs:

$$MI_{max} = \sum_{A=1}^{10} I(S_A, \tau) - \max(II(S_A, S_B; \tau) | A \neq B, B \in 1 - 10) \quad (10)$$

699  $A$  and  $B$  represent each of the 10 muscles in the motor program.  $I(S_A; \tau)$  is the total MI for each muscle  
700  $A$  (Equation (4)) and  $II(S_A, S_B; \tau)$  is the  $II$  for each possible combination of muscles (Equation (5)). To  
701 provide a single best estimate within this range, We assumed that the redundant information in the  
702 entire motor program was proportion the the fraction of MI in each muscle that was redundant. That is,  
703 we reduced the sum of total MIs by the ratio of  $II$  to  $MI$  across all muscle pairs:

$$MI_{MP} = (1 + < \frac{II(S_A, S_B; \tau)}{I(S_A; \tau) + I(S_B; \tau)} >) \sum_{A=1}^{10} I(S_A, \tau) \quad (11)$$

704 where  $MI_{MP}$  is the final estimate for the total motor program MI. The maximum possible yaw torque  
705 entropy for each moth data set was determined by the number of wing strokes  $w$  recorded for that  
706 individual:

$$H_{\tau, max} = \log_2(w) \quad (12)$$

707 To estimate how precisely the motor program MI could define different states of yaw torque output, we  
708 used direct method estimations on the joint probability distribution of the yaw torque PCs for  
709 decreasing bin sizes. This was used to determine the entropy when the motor output was divided into  
710 that number of states. Once  $H_{\tau,max}$  was reached, we did not estimate the entropy for smaller bin sizes.  
711 This gave a mapping between the number of yaw torque states and the yaw torque entropy. The motor  
712 program MI encodes information about yaw torque entropy, so this was used to estimate how many  
713 states of yaw torque can be differentiated or controlled by the spiking activity of the muscles under  
714 perfect transmission from spikes to yaw torque states.

715 **Data availability** The data used in this paper will be made available on Dryad (accession  
716 information upon publication).

## 717 References

- 718 1. Sponberg, S., Dyhr, J. P., Hall, R. W. & Daniel, T. L. Luminance-dependent visual processing enables  
719 moth flight in low light. *Science* **348**, 1245–1248 (2015).
- 720 2. Stöckl, A. L., Kihlström, K., Chandler, S. & Sponberg, S. Comparative system identification of  
721 flower tracking performance in three hawkmoth species reveals adaptations for dim light vision.  
722 *Philosophical Transactions of the Royal Society B* **372**, 20160078 (2017).
- 723 3. Kammer, A. Motor patterns during flight and warm-up in Lepidoptera. *Journal of Experimental*  
724 *Biology* **48**, 89–109 (1968).
- 725 4. Kammer, A. E. The motor output during turning flight in a hawkmoth, *Manduca sexta*. *Journal of*  
726 *Insect Physiology* **17**, 1073–1086 (1971).
- 727 5. Kammer, A. E. & Nachtigall, W. Changing phase relationships among motor units during flight in  
728 a saturniid moth. *Journal of Comparative Physiology* **83**, 17–24 (1973).
- 729 6. Kammer, A. E. *Flying in Comprehensive Insect Physiology, Biochemistry and Pharmacology* (Oxford:  
730 Pergamon Press, Oxford, 1985).

- 731 7. Rheuben, M. & Kammer, A. Structure and innervation of the third axillary muscle of *Manduca*  
732 relative to its role in turning flight. *Journal of Experimental Biology* **131**, 373–402 (1987).
- 733 8. Kraskov, A., Stögbauer, H. & Grassberger, P. Estimating mutual information. *Physical Review E -*  
734 *Statistical, Nonlinear, and Soft Matter Physics* **69**, 066138 (2004).
- 735 9. Srivastava, K. H. *et al.* Motor control by precisely timed spike patterns. *Proceedings of the National*  
736 *Academy of Sciences of the United States of America* **114**, 1171–1176 (2017).
- 737 10. Holmes, C. M. & Nemenman, I. Estimation of mutual information for real-valued data with error  
738 bars and controlled bias. *arXiv*. doi:arXiv:1903.09280[q-bio.QM] (2019).
- 739 11. Timme, N., Alford, W., Flecker, B. & Beggs, J. M. Synergy, redundancy, and multivariate  
740 information measures: An experimentalist's perspective. *Journal of Computational Neuroscience* **36**,  
741 119–140. ISSN: 15736873 (2014).
- 742 12. Steveninck, R. R. D. R. V. *et al.* Reproducibility and Variability in Neural Spike Trains. **275**,  
743 1805–1808 (1997).
- 744 13. Strong, S. P., Koberle, R., de Ruyter van Steveninck, R. R. & Bialek, W. Entropy and information in  
745 neural spike trains. *Physical Review Letters* **80**, 197–200 (Jan. 1998).
